# Supplementary material for: The critical role of the active [GaH]2+ site in n-heptane dehydrocyclization over Ga/H-ZSM-5 zeolite
Source: Royal Society of Chemistry journal article supplement (doi:10.1039/d4cy00648h), 2024-01-01
Supplement: d4cy00648h1.pdf [file d4cy00648h1.pdf]

## Supporting Information

### The Critical Role of Active $[\text{GaH}]^{2+}$ Site in the n-Heptane Dehydrocyclization over Ga/H-ZSM-5 Zeolite

Guangyuan He<sup>†</sup>, Donghai Mei<sup>a,b,\*</sup>

<sup>a</sup>School of Materials Science and Engineering, Tiangong University, Tianjin 300387, China

<sup>b</sup>School of Environmental Science and Engineering, Tiangong University, Tianjin 300387, China

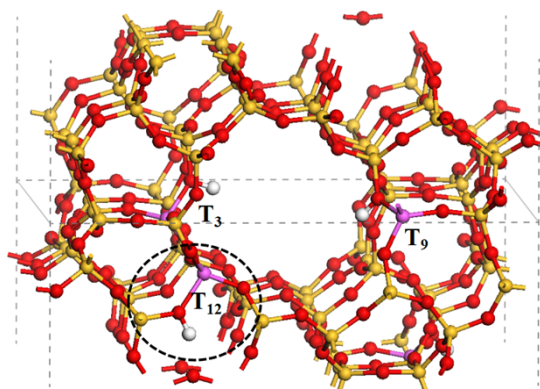

**Fig. S1** Optimized structure of H-ZSM-5. The Si, Al, O, and H atoms are represented by yellow, magenta, red and white spheres, respectively.

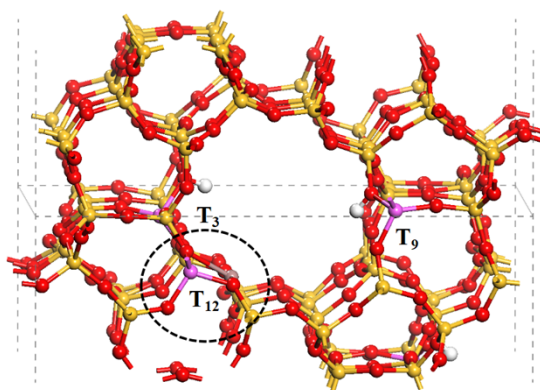

**Fig. S2** Optimized structure of Ga/H-ZSM-5. The color scheme in Figure S1 is applied. The Ga atom is represented by the brown sphere.

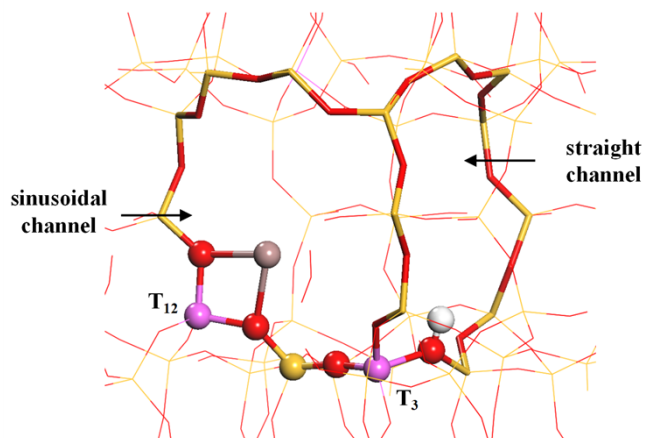

**Fig. S3** Optimized structure of Ga/H-ZSM-5. The color scheme in Figure S1 is applied. The Ga atom is represented by the brown sphere.

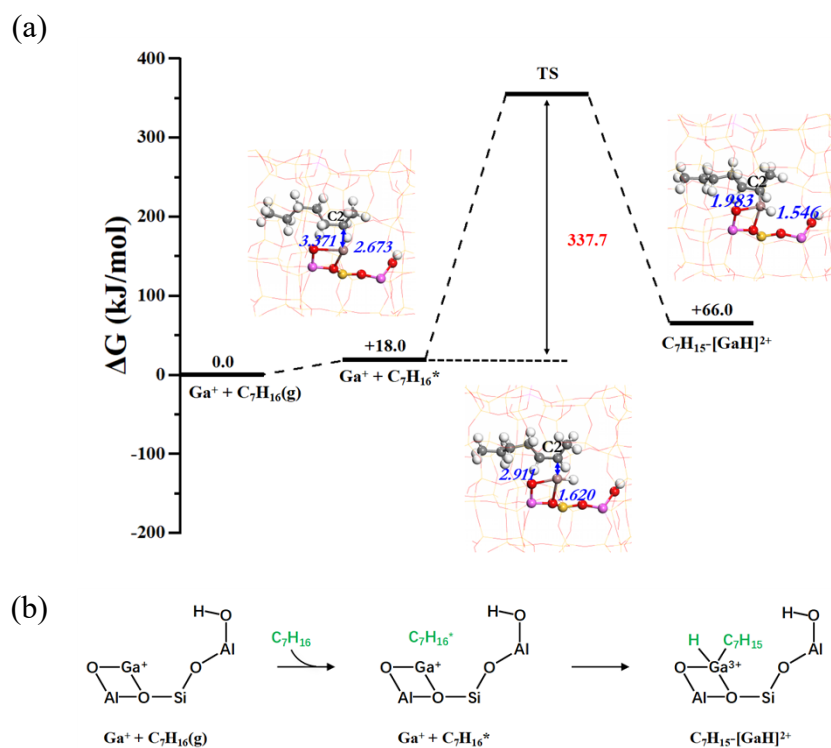

**Fig. S4** The dehydrogenation of n-heptane into  $\text{C}_7\text{H}_{15}\text{-Ga-H}$  by  $\text{Ga}^+$ .

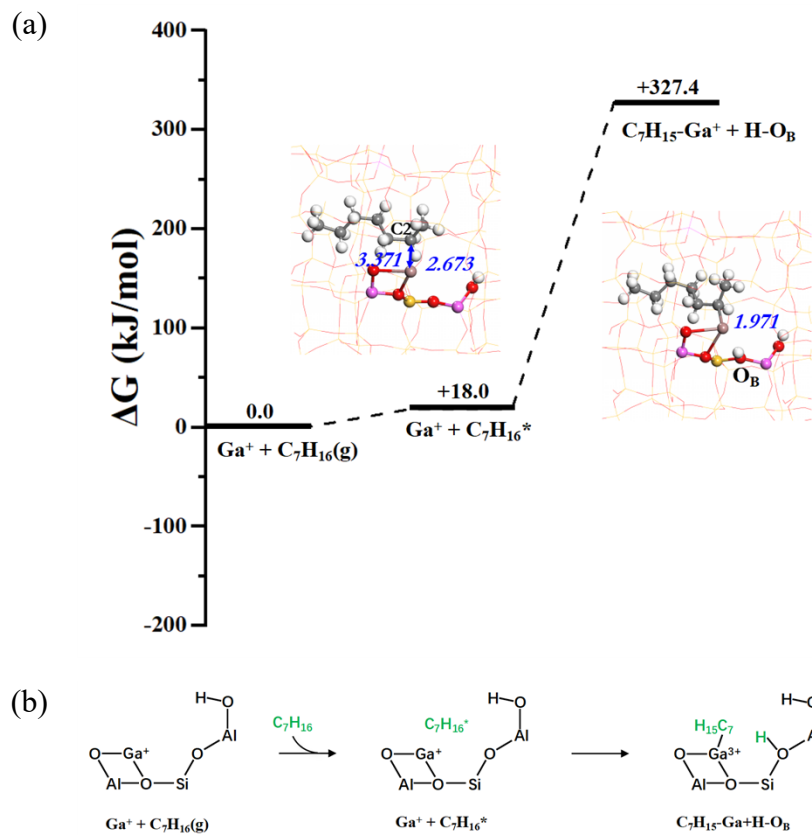

**Fig. S5** The dehydrogenation of n-heptane into  $\text{C}_7\text{H}_{15}\text{-Ga}$  and  $\text{H-O}_\text{B}$  by  $\text{Ga}^+$ .

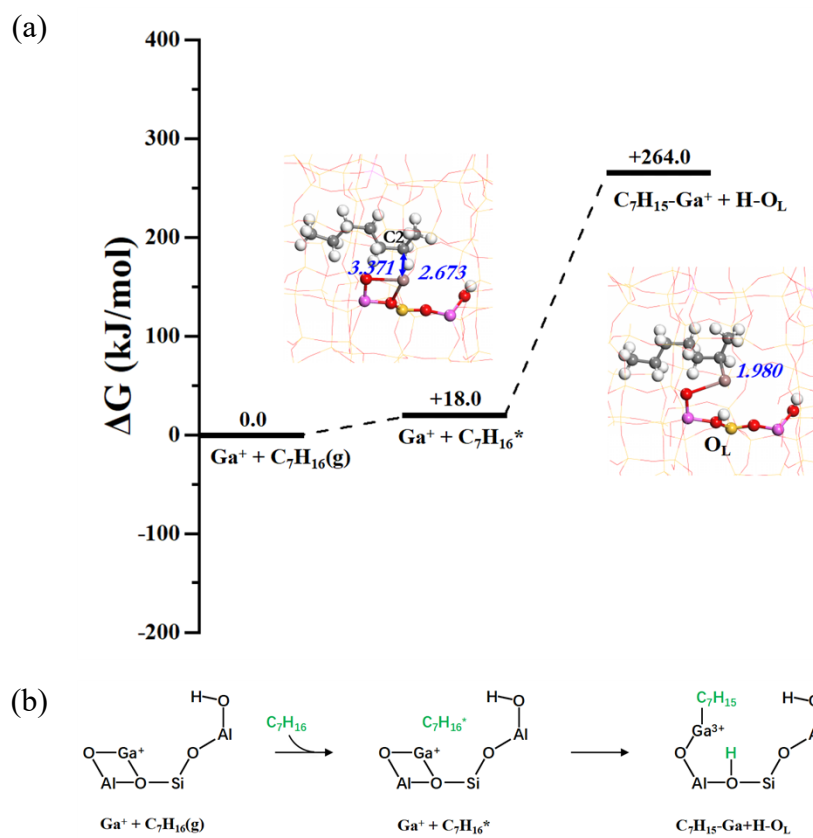

**Fig. S6** The dehydrogenation of n-heptane into  $\text{C}_7\text{H}_{15}\text{-Ga}$  and  $\text{H-O}_L$  by  $\text{Ga}^+$ .

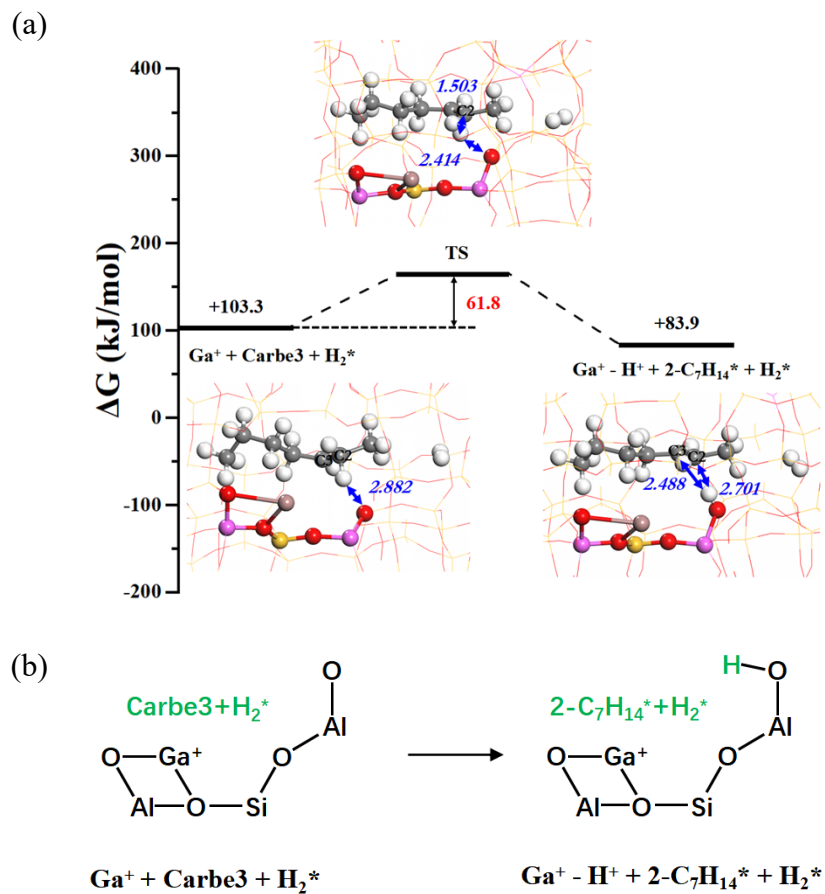

**Fig. S7** The dehydrogenation of Carbe3 into 2-C<sub>7</sub>H<sub>14</sub> accompanied by the BAS recovery.



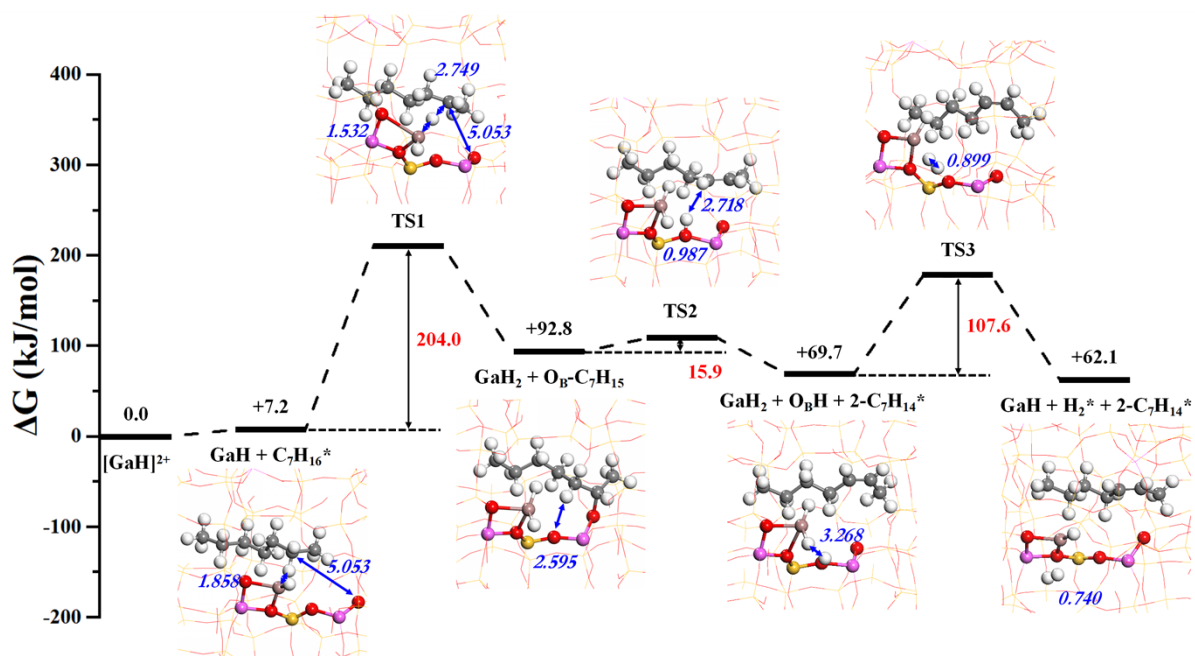

**Fig. S9** The Gibbs free energy profile of the n-heptane to 2-heptene process over the  $[\text{GaH}]^{2+}$  site via a carbenium mechanism.

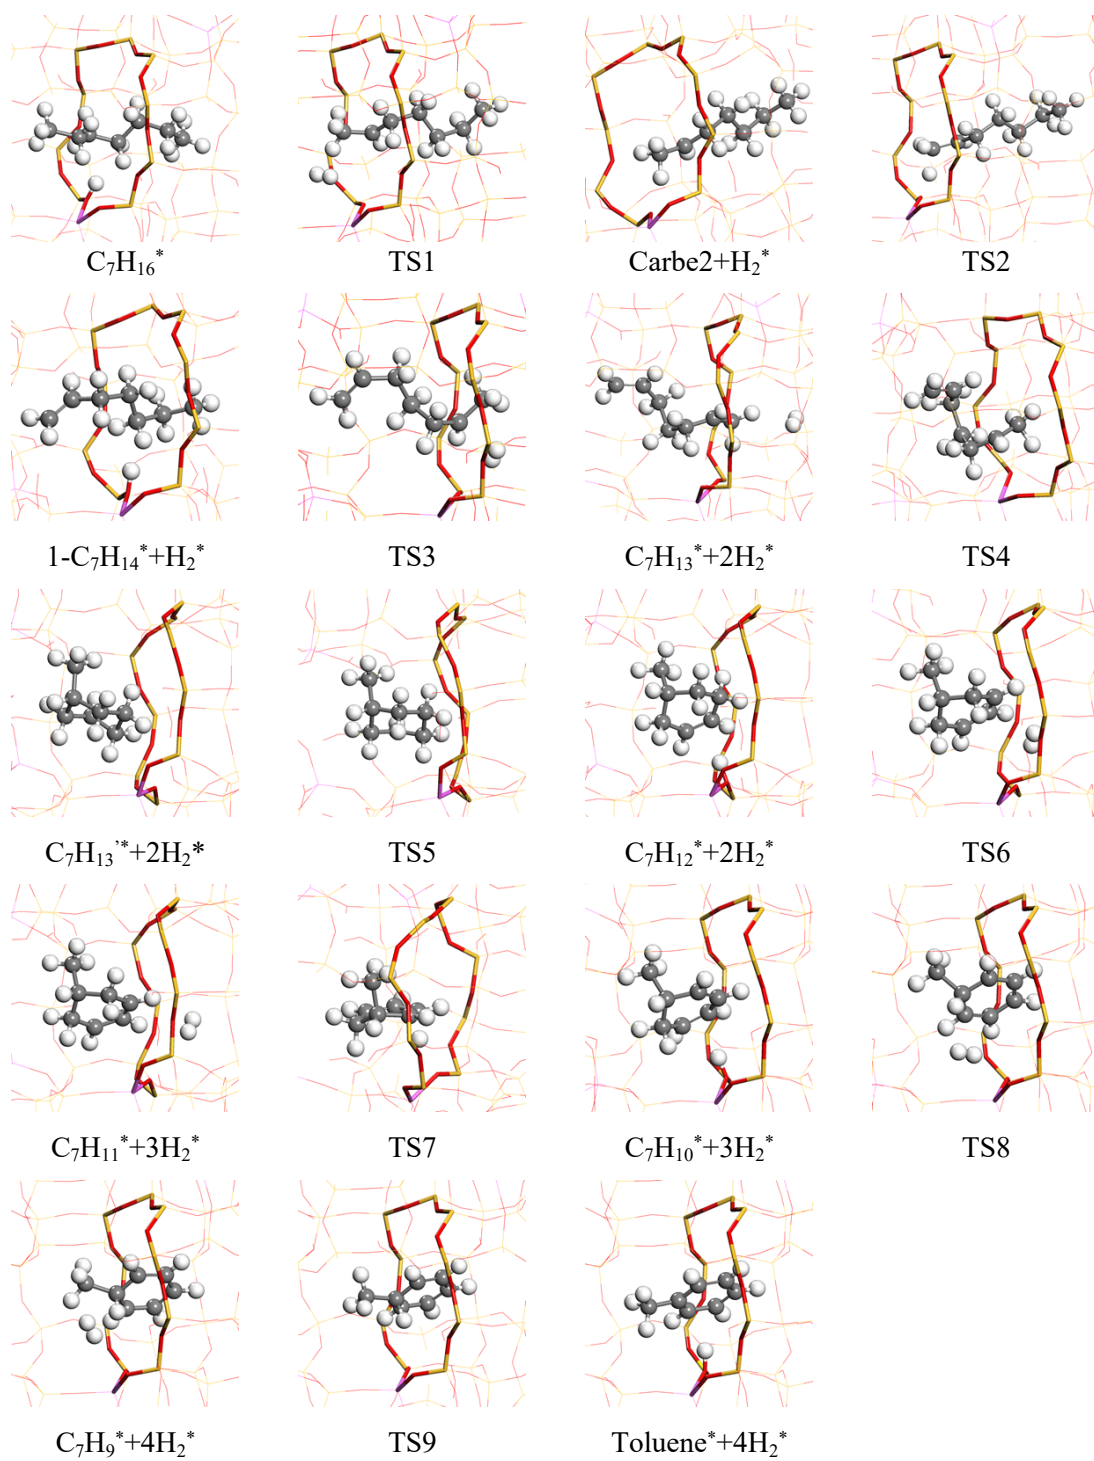

**Fig. S10** The corresponding optimized structures of the n-heptane to toluene process over H-ZSM-5.



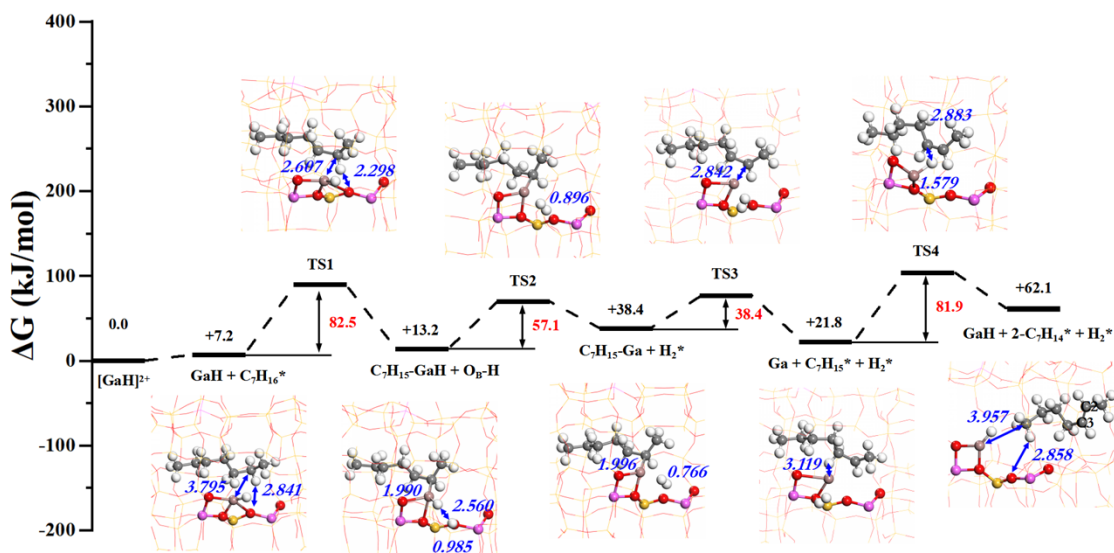

Fig. S11 The Gibbs free energy profile of the n-heptane to 2-heptene process over the  $[\text{GaH}]^{2+}$  site.

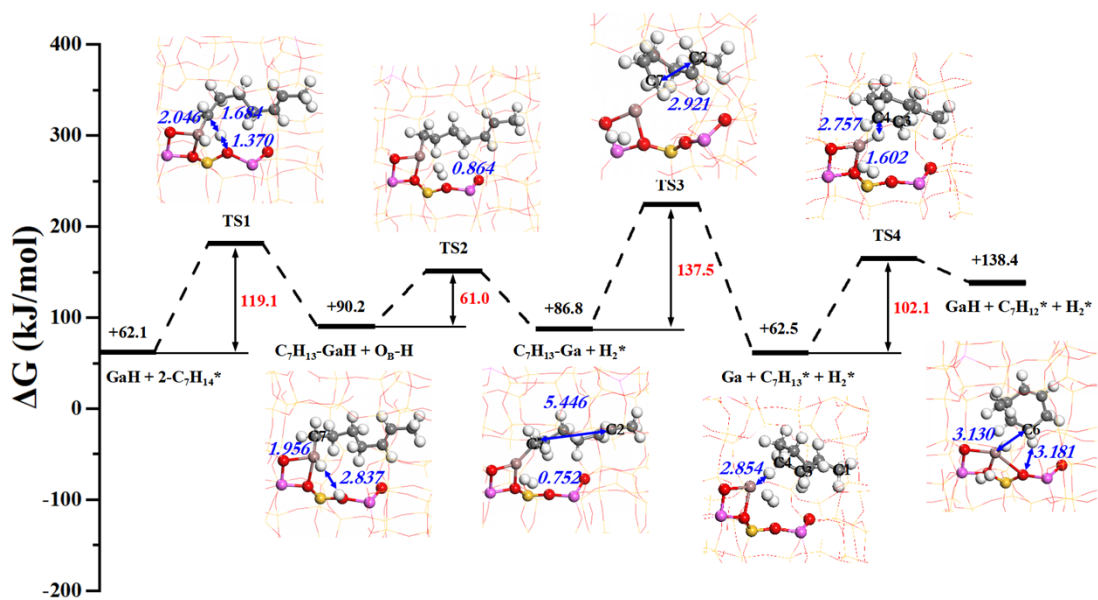

Fig. S12 The Gibbs free energy profile of 2-heptene to methylcyclohexene process over the  $[\text{GaH}]^{2+}$  site.

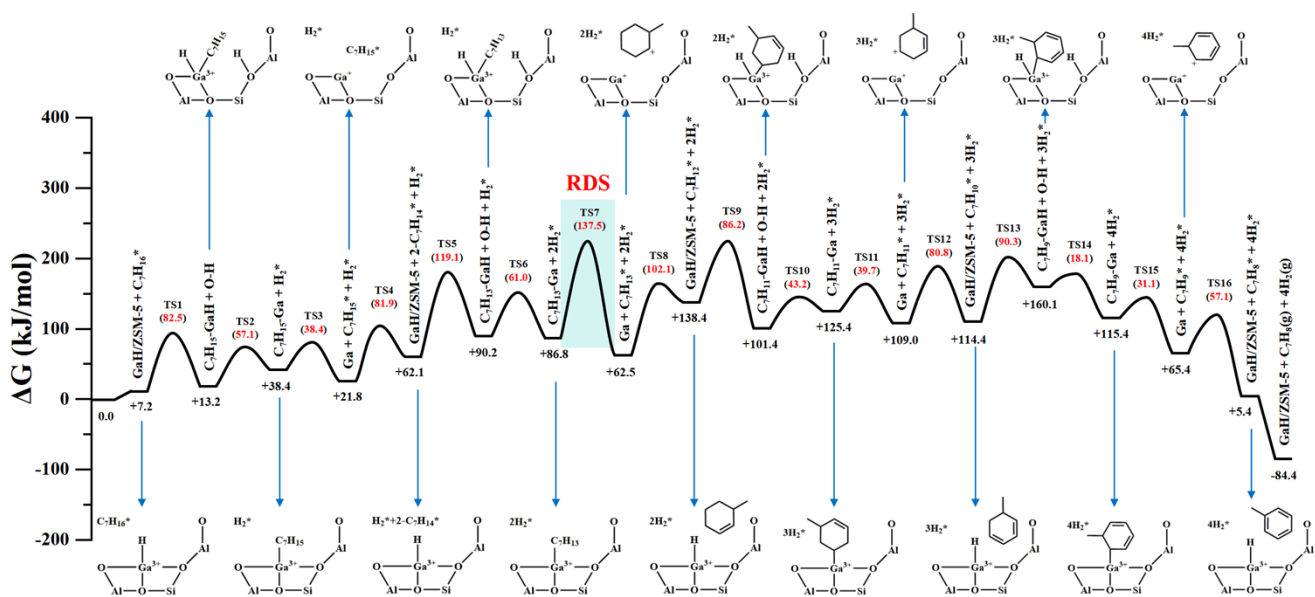

**Fig. S13** The Gibbs free energy profiles for the aromatization of n-heptane to toluene via C2-C7 cyclization over the  $[GaH]^{2+}$  site.

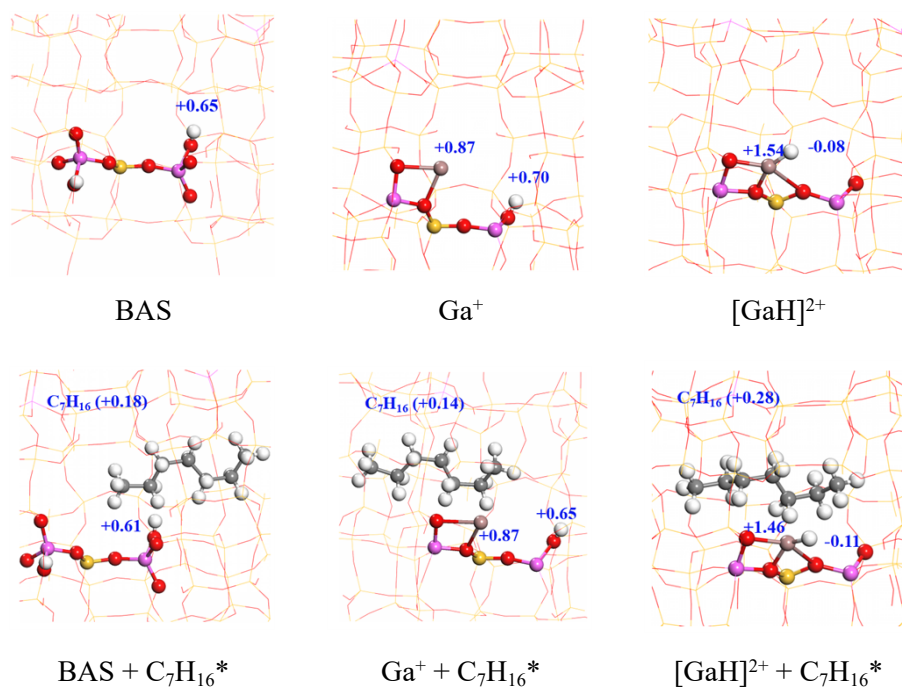

**Fig. S14** Bader charges of  $H_B$ , Ga, and  $C_7H_{16}^*$  in (a-b) BAS, (c-d)  $Ga^+$  and (e-f)  $[GaH]^{2+}$  site.

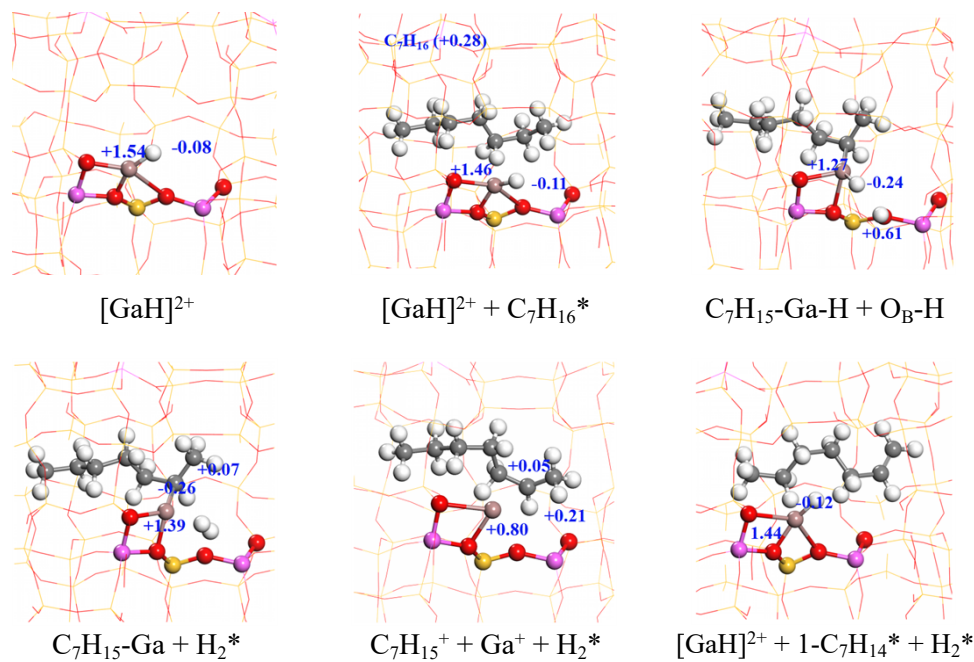

**Fig. S15** Calculated Bader charges for n-heptane dehydrogenation to 1-heptene and  $\text{H}_2$  at the  $[\text{GaH}]^{2+}$  active site.
